# Supplementary material
Source: Springer Nature journal article supplement (https://www.springermedizin.de/resource/supplementary/13256_2011_1724_MOESM3_ESM.pdf/9648294)
Supplement: MOESM3 [file 9648294]

SIGMA EXCITE 0.38T GE  
Ex: 1036  
Sx: 107  
In: 7  
Ocor PO.9

ET:13

FSEIR  
TR:3200  
TE:122.6/EF  
EC:1/1 17.3/Hz  
T1:119  
Small Free-FL:06B  
FOV:150x125  
4.0cm/10.4ap  
20/04/126  
288/132/2.0 HX  
Sx:9/VB/ED/50/BC

TFR

W = 1495 L = 717

SIGMA EXCITE 0.38T GE  
Ex: 1036  
Sx: 107  
In: 6  
Ocor A3.5

ET:13

FSEIR  
TR:3200  
TE:122.6/EF  
EC:1/1 17.3/Hz  
T1:117  
Small Free-FL:06B  
FOV:150x125  
4.0cm/10.4ap  
20/04/126  
288/132/2.0 HX  
Sx:9/VB/ED/50/BC

TFR

W = 1444 L = 720

SIGMA EXCITE 0.35T GE  
Ex: 1036  
Sx: 110  
In: 7  
Ocor PO.9

013.0

GR/25  
TR:720  
TE:113.4  
EC:1/1 7.3/Hz  
Small Free-FL:06B  
FOV:150x125  
4.0cm/10.4ap  
20/04/126  
288/132/2.0 HX  
Sx:9/VB/ED

TFR

W = 750 L = 395

SIGMA EXCITE 0.35T GE  
Ex: 1036  
Sx: 110  
In: 6  
Ocor A3.5

GR/25  
TR:720  
TE:113.4  
EC:1/1 7.3/Hz  
Small Free-FL:06B  
FOV:150x125  
4.0cm/10.4ap  
20/04/126  
288/132/2.0 HX  
Sx:9/VB/ED

TFR

W = 725 L = 395
